# Supplementary material
Source: Springer Nature journal article supplement (https://www.springermedizin.de/resource/supplementary/12958_2012_1114_MOESM17_ESM.pdf/9566844)

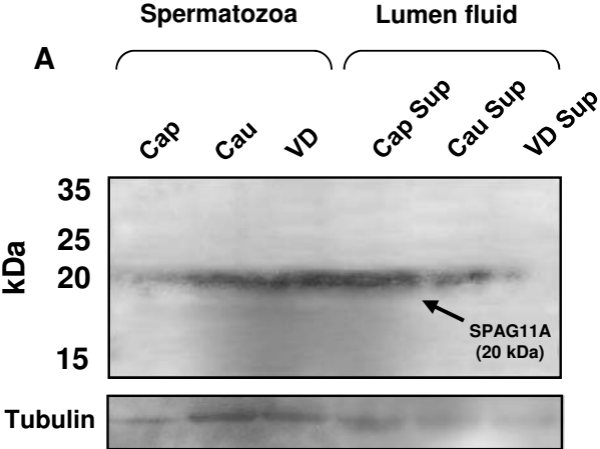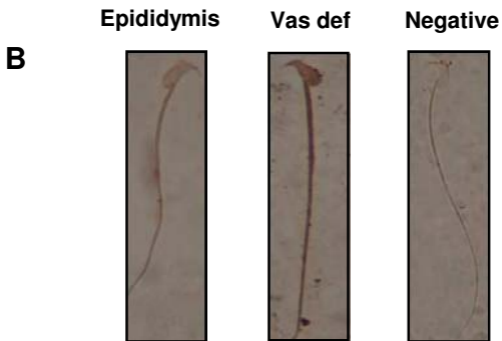

Supplement: MOESM17 [file 9566844]
